# Supplementary material for: Asymmetric changes in temperature in the Arctic during the Holocene based on a transient run with the Community Earth System Model (CESM)
Source: Copernicus journal article supplement (doi:10.5194/cp-19-665-2023), 2023-03-23
Supplement: Supplementary file 1 [file cp-19-665-2023-supplement.pdf]

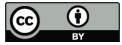

*Supplement of*

**Asymmetric changes in temperature in the Arctic during the Holocene based on a transient run with the Community Earth System Model (CESM)**

**Hongyue Zhang et al.**

*Correspondence to:* Jesper Sjolte ([jesper.sjolte@geol.lu.se](mailto:jesper.sjolte@geol.lu.se)) and Jian Liu ([jliu@nju.edu.cn](mailto:jliu@nju.edu.cn))

The copyright of individual parts of the supplement might differ from the article licence.

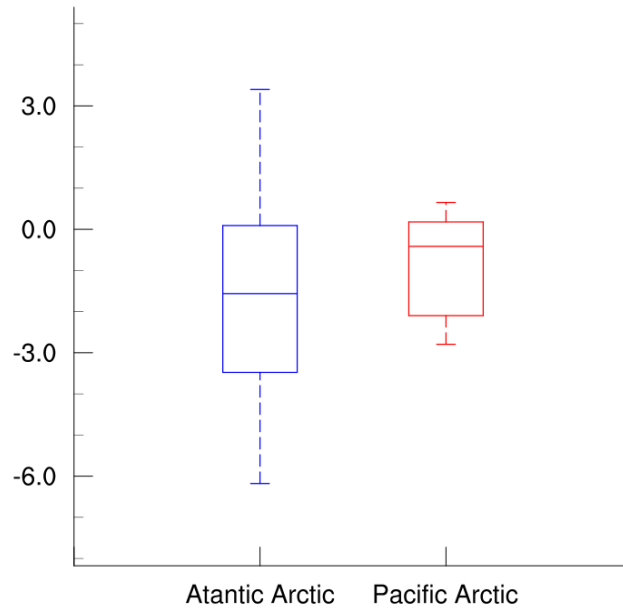

Figure S1. The box diagram of annual temperature changes in Atlantic Arctic and Pacific Arctic between two period (0-2 ka BP and 5-8 ka BP) in Reconstructions (Temperature 12k);

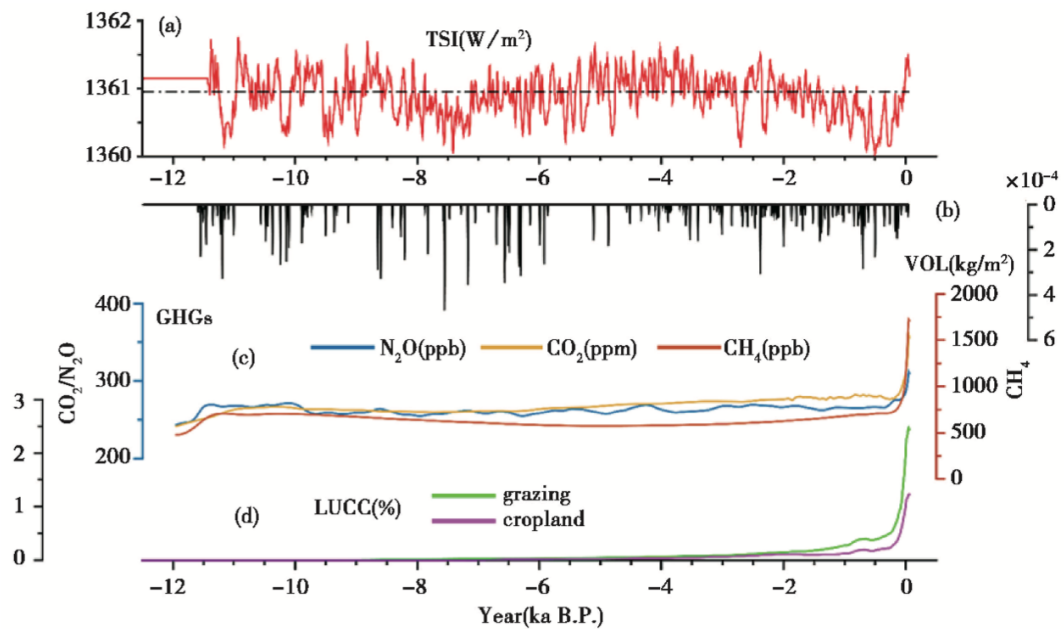

Figure S2. The external forcing timeseries used in the NNU-Hol simulation. The TSI VOL, GHG and LUCC are a b c and d respectively (Wan et al.2020)

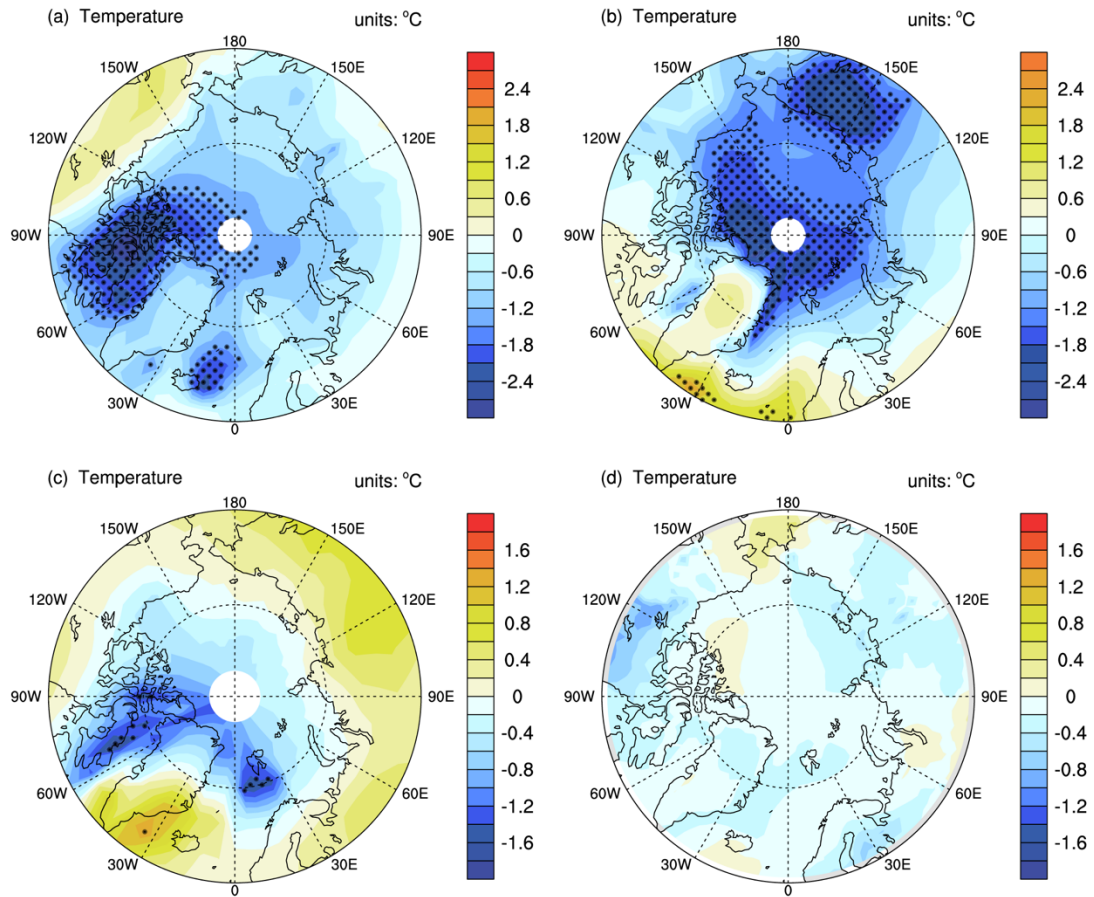

**Figure S3. (a) The annual temperature changes between two period (0-2 ka BP and 5-8 ka BP) in NNU-Holocene All forcing simulations (Pacific Arctic:-0.62, Atlantic Arctic:-1.04; significant at the 90% confidence level); (b) Same as (a) but for TraCE-21ka simulation (Pacific Arctic:-0.94, Atlantic Arctic:-0.06; significant at the 90% confidence level) (c) Same as (a) but for ECBilt-CLIO simulation (Pacific Arctic:-0.02, Atlantic Arctic:-0.26; significant at the 90% confidence level); (d) The annual temperature changes between two period (0-2 ka BP and 4-6 ka BP) in IPSL ESM simulation (Pacific Arctic:-0.14 Atlantic Arctic:-0.18; not significant) Areas that are dotted are significant at the 90% confidence level.**
